# Supplementary material for: Circulating Autoantibodies in Age-Related Macular Degeneration Recognize Human Macular Tissue Antigens Implicated in Autophagy, Immunomodulation, and Protection from Oxidative Stress and Apoptosis
Source: PLOS journal article supplement (doi:10.1371/journal.pone.0145323), 2015-12-30
Supplement: S1 (10.1371/journal.pone.0145323.s001) [file journal.pone.0145323.s001]

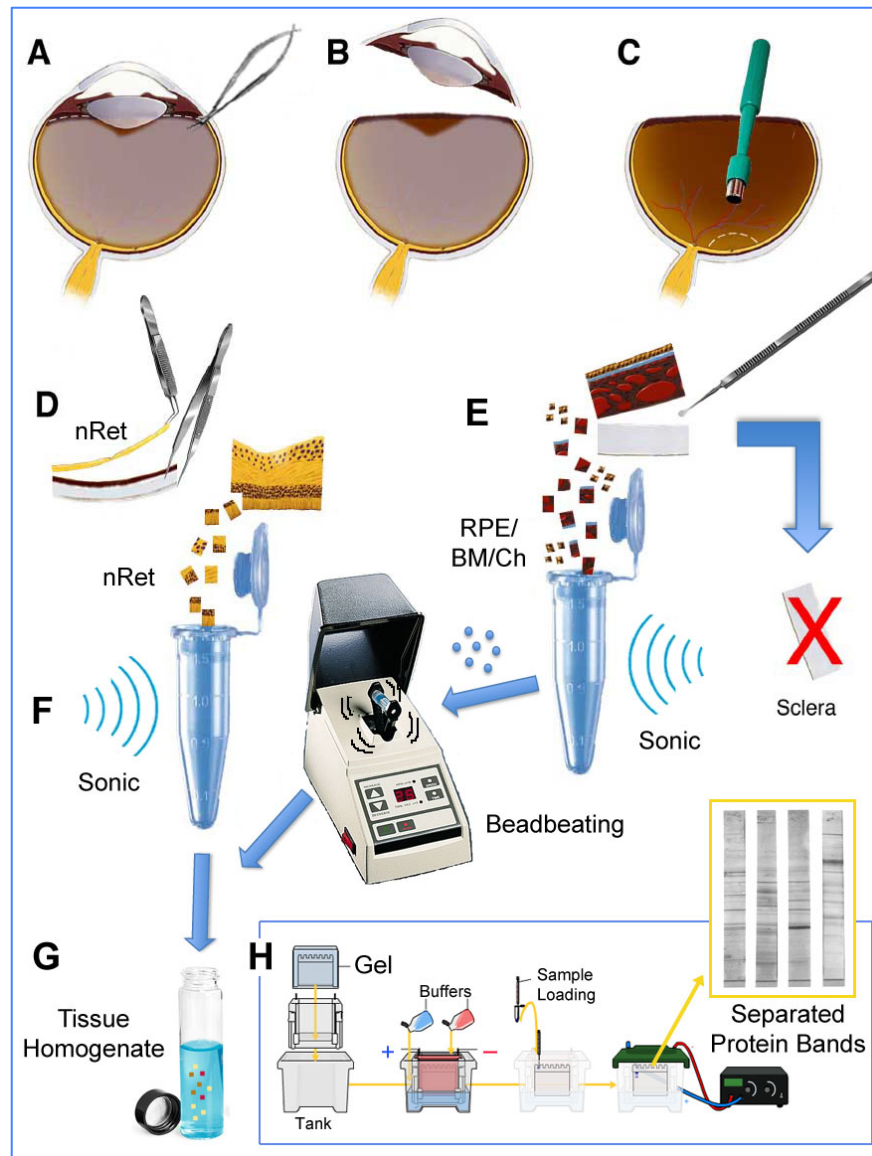

**S1 Fig. Schematic step-by-step representation of the methodology used to harvest full-thickness macular tissue punches and prepare the whole-macular lysates. See S1 Supplemental Methods text for detailed explanations of the individual steps.**
